# Supplementary material for: A Compendium of the Most Promising Synthesized Organic Compounds against Several Fusarium oxysporum Species: Synthesis, Antifungal Activity, and Perspectives
Source: MDPI journal article supplement (doi:10.3390/molecules26133997), 2021-06-30
Supplement: s1 [file s1]

**Table S1.** Compendium of the most promising organic compounds against several *Fusarium oxysporum* synthesized between 2010-2020 with their bioactive measure.

| Compounds                                                                           |                                                                                                                        | Bioactivity measure | Reported value<br>(Units in $\mu\text{M}$ ) | Tested Microbial Strain                         | Reference       |
|-------------------------------------------------------------------------------------|------------------------------------------------------------------------------------------------------------------------|---------------------|---------------------------------------------|-------------------------------------------------|-----------------|
| Core                                                                                | Substituents and label                                                                                                 |                     |                                             |                                                 |                 |
| 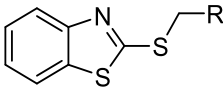   | <br>90                                | IC <sub>50</sub>    | $0.0067 \pm 0.0005 \mu\text{M}$             | <i>Fusarium oxysporum</i> M15-Pa                | Ballari, 2017   |
|                                                                                     | <br>91                                |                     | $0.23 \pm 0.05 \mu\text{M}$                 |                                                 |                 |
|  | <br>2                                 | IC <sub>50</sub>    | 0.055 $\mu\text{M}$                         | <i>Fusarium oxysporum</i> f.sp <i>Albedinis</i> | Radi, 2015      |
|                                                                                     | <br>3                               |                     | 0.079 $\mu\text{M}$                         |                                                 |                 |
|                                                                                     | <br>4                               |                     | 0.092 $\mu\text{M}$                         |                                                 |                 |
|  | $R_1 = \text{CF}_3$ $R_2 =$ <br>104 | MIC                 | $0.2 \mu\text{g mL}^{-1}$ (0.45)            | <i>Fusarium oxysporum</i>                       | Puttaraju, 2013 |
|                                                                                     | $R_1 = \text{CF}_3$ $R_2 =$ <br>105 |                     | $0.2 \mu\text{g mL}^{-1}$ (0.45)            |                                                 |                 |
|                                                                                     | $R_1 = \text{PhCF}_3$ $R_2 = \text{H}$<br>106                                                                          |                     | $0.2 \mu\text{g mL}^{-1}$ (0.61)            |                                                 |                 |
|  | $R_1 =$ <br>107                     | MIC                 | $0.312 \mu\text{g mL}^{-1}$ (0.77)          | <i>Fusarium oxysporum</i> CTM 10402             | Aouali, 2015    |
|                                                                                     |                                                                                                                        | MFC                 | $2.5 \mu\text{g mL}^{-1}$ (6.16)            |                                                 |                 |

|                                                                                     |                                                                                           |                  |                                      |                                        |                   |
|-------------------------------------------------------------------------------------|-------------------------------------------------------------------------------------------|------------------|--------------------------------------|----------------------------------------|-------------------|
| 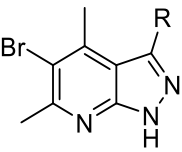   | <br>108  | MIC              | 0.98 $\mu\text{g mL}^{-1}$<br>(2.21) | <i>Fusarium oxysporum</i><br>ATCC 7601 | Salem, 2016       |
|                                                                                     | <br>109  |                  | 1.95 $\mu\text{g mL}^{-1}$<br>(4.43) |                                        |                   |
|                                                                                     | <br>110  |                  | 1.95 $\mu\text{g mL}^{-1}$<br>(5.29) |                                        |                   |
|  | <br>40   | MIC              | 1 $\mu\text{g mL}^{-1}$<br>(2.22)    | <i>Fusarium oxysporum</i>              | Basanagouda, 2010 |
|                                                                                     | <br>41 |                  | 1 $\mu\text{g mL}^{-1}$<br>(2.22)    |                                        |                   |
|                                                                                     | <br>39 |                  | 1 $\mu\text{g mL}^{-1}$<br>(2.84)    |                                        |                   |
|  | <br>92 | IC <sub>50</sub> | 2.3 $\pm$ 1.0 $\mu\text{M}$          | <i>Fusarium oxysporum</i><br>M15-Pa    | Ballari, 2019     |
|                                                                                     | <br>93 |                  | 15.2 $\pm$ 1.4 $\mu\text{M}$         |                                        |                   |
|                                                                                     | <br>94 |                  | 23 $\pm$ 8 $\mu\text{M}$             |                                        |                   |
|  | <br>77 | MIC              | 3.12 $\mu\text{g mL}^{-1}$<br>(8.68) | <i>Fusarium oxysporum</i>              | Yusuf, 2019       |

|                                                                                           |                                                                                           |                  |                                       |                                                     |                        |
|-------------------------------------------------------------------------------------------|-------------------------------------------------------------------------------------------|------------------|---------------------------------------|-----------------------------------------------------|------------------------|
|                                                                                           | 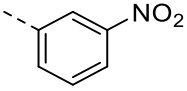<br>78   |                  | 3.12 $\mu\text{g mL}^{-1}$<br>(8.68)  |                                                     |                        |
| <br>111  | <br>111  | MIC              | 3.12 $\mu\text{g mL}^{-1}$<br>(8.73)  | <i>Fusarium oxysporum</i>                           | Kumar, 2018            |
|                                                                                           | <br>112  |                  | 6.25 $\mu\text{g mL}^{-1}$<br>(17.78) |                                                     |                        |
| <br>26   | R= Br<br>26                                                                               | MIC              | 3.9 $\mu\text{g mL}^{-1}$<br>(10.84)  | <i>Fusarium oxysporum</i> AB18                      | Ajdačić, 2016          |
|                                                                                           | R= CH <sub>3</sub><br>27                                                                  |                  | 7.8 $\mu\text{g mL}^{-1}$<br>(26.46)  |                                                     |                        |
| <br>75 | <br>75 | MIC              | 8 $\mu\text{g mL}^{-1}$<br>(12.11)    | <i>Fusarium oxysporum</i> MTCC 2480                 | Yusuf, 2014            |
|                                                                                           | <br>76 |                  | 8 $\mu\text{g mL}^{-1}$<br>(12.11)    |                                                     |                        |
| <br>21 | R=CF <sub>3</sub><br>21                                                                   | EC <sub>50</sub> | 4.1 $\mu\text{g mL}^{-1}$<br>(13.04)  | <i>Fusarium oxysporum</i> f. sp. <i>lycopersici</i> | Lv, 2018               |
|                                                                                           | R=NO <sub>2</sub><br>22                                                                   |                  | 7.4 $\mu\text{g mL}^{-1}$<br>(25.40)  |                                                     |                        |
| <br>28 | <br>28 | MIC              | 6.25 $\mu\text{g mL}^{-1}$<br>(13.28) | <i>Fusarium oxysporum</i>                           | Narayanan, 2012        |
| <br>95 | <br>95 | MIC              | 6.25 $\mu\text{g mL}^{-1}$<br>(24.13) | <i>Fusarium oxysporum</i>                           | Bondock, 2009 and 2010 |

|                                                                                     |                                                                                           |                  |                                      |                                        |           |
|-------------------------------------------------------------------------------------|-------------------------------------------------------------------------------------------|------------------|--------------------------------------|----------------------------------------|-----------|
|                                                                                     | 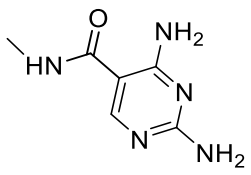<br>96   |                  | 6.25 µg mL <sup>-1</sup><br>(21.83)  |                                        |           |
|                                                                                     | <br>97   |                  | 6.25 µg mL <sup>-1</sup><br>(20.01)  |                                        |           |
|                                                                                     | <br>98   |                  | 6.25 µg mL <sup>-1</sup><br>(13.34)  |                                        |           |
|                                                                                     | <br>99  |                  | 12.5 µg mL <sup>-1</sup><br>(32.51)  |                                        |           |
|  | <br>51 | EC <sub>50</sub> | 8.221 µg mL <sup>-1</sup><br>(14.58) | <i>Fusarium oxysporum</i> (S-chl) f.sp | Liu, 2014 |
|                                                                                     | <br>52 |                  | 9.171 µg mL <sup>-1</sup><br>(17.48) |                                        |           |
|                                                                                     | <br>53 |                  | 9.339 µg mL <sup>-1</sup><br>(18.36) |                                        |           |
|                                                                                     | <br>54 |                  | 8.359 µg mL <sup>-1</sup><br>(20.82) |                                        |           |

|                                                                                           |                                                                                           |     |                                       |                                                                                                     |                    |
|-------------------------------------------------------------------------------------------|-------------------------------------------------------------------------------------------|-----|---------------------------------------|-----------------------------------------------------------------------------------------------------|--------------------|
| 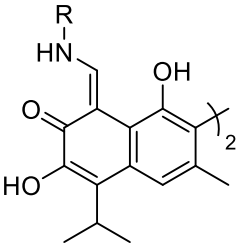         | <br>15   | MIC | 16 $\mu\text{g mL}^{-1}$<br>(16.41)   | <i>Fusarium oxysporum</i> f. sp. <i>Betae</i> & <i>Fusarium oxysporum</i> f. sp. <i>lycopersici</i> | Pyta, 2016         |
|                                                                                           | <br>16   |     | 16 $\mu\text{g mL}^{-1}$<br>(16.89)   |                                                                                                     |                    |
|          | <br>56   | MIC | 9 $\mu\text{g mL}^{-1}$<br>(16.63)    | <i>Fusarium oxysporum</i>                                                                           | Rajanarendar, 2012 |
|                                                                                           | <br>55   |     | 8 $\mu\text{g mL}^{-1}$<br>(18.65)    |                                                                                                     |                    |
|                                                                                           | <br>57 |     | 9 $\mu\text{g mL}^{-1}$<br>(20.84)    |                                                                                                     |                    |
| <br>42 | <br>61 | MIC | 16 $\mu\text{g mL}^{-1}$<br>(17.40)   | <i>Fusarium oxysporum</i>                                                                           | Yusuf, 2019        |
|        | <br>64 | MIC | 6.25 $\mu\text{g mL}^{-1}$<br>(17.44) | <i>Fusarium oxysporum</i> ATCC 16417                                                                | Bondock, 2011      |
|                                                                                           | <br>65 |     | 12.5 $\mu\text{g mL}^{-1}$<br>(42.91) |                                                                                                     |                    |

|                                                                                     |                                                                                                       |     |                                       |                                             |                |
|-------------------------------------------------------------------------------------|-------------------------------------------------------------------------------------------------------|-----|---------------------------------------|---------------------------------------------|----------------|
| 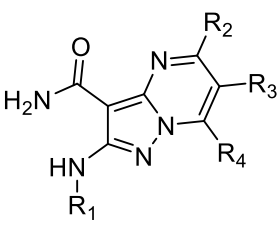   |  <p><b>113</b></p>   | MIC | 7.81 $\mu\text{g mL}^{-1}$<br>(17.93) | <i>Fusarium oxysporum</i><br>RCMB<br>008002 | Hassan, 2017   |
|                                                                                     |  <p><b>114</b></p>   |     | 7.81 $\mu\text{g mL}^{-1}$<br>(19.34) |                                             |                |
|    |  <p><b>66</b></p>    | MIC | 8 $\mu\text{g mL}^{-1}$<br>(18.08)    | <i>Fusarium oxysporum</i>                   | Upadhyay, 2010 |
|                                                                                     |  <p><b>67</b></p>    |     | 9 $\mu\text{g mL}^{-1}$<br>(20.34)    |                                             |                |
|  |  <p><b>17</b></p>  | MIC | 6.25 $\mu\text{g mL}^{-1}$<br>(21.46) | <i>Fusarium oxysporum</i>                   | Fadda, 2013    |
|                                                                                     |  <p><b>18</b></p>  |     | 6.25 $\mu\text{g mL}^{-1}$<br>(22.26) |                                             |                |
|  |  <p><b>83</b></p>  | MIC | 12.5 $\mu\text{g mL}^{-1}$<br>(24.58) | <i>Fusarium oxysporum</i><br>NCIM 1332      | Deshmukh, 2019 |
|                                                                                     |  <p><b>85</b></p>  |     | 25 $\mu\text{g mL}^{-1}$<br>(49.16)   |                                             |                |
|                                                                                     |  <p><b>84</b></p>  |     | 25 $\mu\text{g mL}^{-1}$<br>(51.59)   |                                             |                |
|  |  <p><b>100</b></p> | MIC | 12.5 $\mu\text{g mL}^{-1}$<br>(25.85) | <i>Fusarium oxysporum</i>                   | Fadda, 2019    |

|                                                                                     |                                                                                                  |                  |                                      |                                          |                    |
|-------------------------------------------------------------------------------------|--------------------------------------------------------------------------------------------------|------------------|--------------------------------------|------------------------------------------|--------------------|
|                                                                                     | 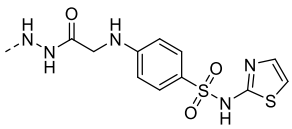<br><b>101</b>  |                  | 25 µg mL <sup>-1</sup><br>(54.28)    |                                          |                    |
|    | R: NMe <sub>2</sub><br><b>29</b>                                                                 | MIC              | 12.5 µg mL <sup>-1</sup><br>(27.69)  | <i>Fusarium oxysporum</i><br>ATCC 16417  | Ramesh, 2015       |
|                                                                                     | R: H<br><b>30</b>                                                                                |                  | 12.5 µg mL <sup>-1</sup><br>(30.61)  |                                          |                    |
|   | <br><b>31</b>   | EC <sub>50</sub> | 10.1 µg mL <sup>-1</sup><br>(27.79)  | <i>Fusarium oxysporum</i>                | Pan, 2017          |
|                                                                                     | <br><b>32</b>  |                  | 10.6 µg mL <sup>-1</sup><br>(29.33)  |                                          |                    |
|  | R: OCH <sub>3</sub><br><b>115</b>                                                                | MIC              | 8 µg mL <sup>-1</sup><br>(27.94)     | <i>Fusarium oxysporum</i>                | Rajanarendar, 2013 |
|                                                                                     | R: CH <sub>3</sub><br><b>116</b>                                                                 |                  | 8 µg mL <sup>-1</sup><br>(29.60)     |                                          |                    |
|  | R: Cl<br><b>86</b>                                                                               | MIC              | 12.5 µg mL <sup>-1</sup><br>(28.42)  | <i>Fusarium oxysporum</i><br>NCIM 1332   | Shaikh, 2015       |
|  | <br><b>88</b> | MIC              | 15.62 µg mL <sup>-1</sup><br>(28.53) | <i>Fusarium oxysporum</i><br>RCMB 008002 | Ammar, 2020        |

|                                                                                     |                                                                                                                                                  |     |                                             |                                             |                |
|-------------------------------------------------------------------------------------|--------------------------------------------------------------------------------------------------------------------------------------------------|-----|---------------------------------------------|---------------------------------------------|----------------|
|                                                                                     | 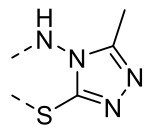<br>89                                                          |     | 15.62 $\mu\text{g mL}^{-1}$<br>(38.52)      |                                             |                |
|                                                                                     | $\text{R}_1, \text{R}_2 = \text{Cl}$<br>87                                                                                                       |     | 15.62 $\mu\text{g mL}^{-1}$<br>(44.86)      |                                             |                |
|    | <br>10                                                          | MIC | 15.6 $\mu\text{g mL}^{-1}$<br>(36.24)       | <i>Fusarium oxysporum</i><br>RCMB<br>008002 | Ghorab, 2017   |
|                                                                                     | <br>11                                                          |     | 15.6 $\mu\text{g mL}^{-1}$<br>(37.64)       |                                             |                |
|                                                                                     | <br>12                                                          |     | 15.6 $\mu\text{g mL}^{-1}$<br>(39.15)       |                                             |                |
|  | $\text{R}: \text{Cl}$<br>33                                                                                                                      | MIC | 12.5 $\mu\text{g mL}^{-1}$<br>(36.36)       | <i>Fusarium oxysporum</i>                   | Makandar, 2012 |
|                                                                                     | $\text{R}: \text{OMe}$<br>34                                                                                                                     |     | 12.5 $\mu\text{g mL}^{-1}$<br>(36.83)       |                                             |                |
|  | $\text{R}_1, \text{R}_2 =$  $\text{R}_3 : \text{Cl}$<br>117   | MIC | 12.50 $\mu\text{g mL}^{-1}$<br>(37.45)      | <i>Fusarium oxysporum</i><br>ATCC<br>16417  | Patel, 2012    |
|                                                                                     | $\text{R}_1, \text{R}_2 =$  $\text{R}_3 = \text{H}$<br>118    |     | 12.50 $\mu\text{g mL}^{-1}$<br>(49.74)      |                                             |                |
|                                                                                     | $\text{R}_1, \text{R}_2 =$  $\text{R}_3 = \text{CH}_3$<br>119 |     | 12.50 $\mu\text{g mL}^{-1}$<br>(49.74)      |                                             |                |
|  | <br>102                                                       | MIC | 16 $\pm$ 1 $\mu\text{g mL}^{-1}$<br>(37.63) | <i>Fusarium oxysporum</i>                   | Zha, 2017      |



|                                                                                     |                                                                                           |     |                                           |                           |                |
|-------------------------------------------------------------------------------------|-------------------------------------------------------------------------------------------|-----|-------------------------------------------|---------------------------|----------------|
|                                                                                     | 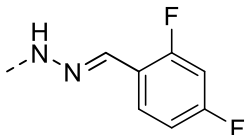<br>103  |     | $18 \pm 2 \mu\text{g mL}^{-1}$<br>(59.34) |                           |                |
|    | <br>7    | MIC | $21 \pm 3 \mu\text{g mL}^{-1}$<br>(39.14) | <i>Fusarium oxysporum</i> | Ravindar, 2018 |
|                                                                                     | <br>8    |     | $23 \pm 0 \mu\text{g mL}^{-1}$<br>(41.63) |                           |                |
|   | <br>23   | MIC | $25 \mu\text{g mL}^{-1}$<br>(39.84)       | <i>Fusarium oxysporum</i> | Shankar, 2016  |
|                                                                                     | <br>24 |     | $25 \mu\text{g mL}^{-1}$<br>(47.40)       |                           |                |
|  | <br>42 | MIC | $21 \pm 2 \mu\text{g mL}^{-1}$<br>(42.12) | <i>Fusarium oxysporum</i> | Chen, 2017     |
|                                                                                     | <br>43 |     | $22 \pm 2 \mu\text{g mL}^{-1}$<br>(46.27) |                           |                |
|                                                                                     | <br>44 |     | $20 \pm 2 \mu\text{g mL}^{-1}$<br>(45.99) |                           |                |
|  | <br>25 | MIC | $25 \mu\text{g mL}^{-1}$<br>(44.74)       | <i>Fusarium oxysporum</i> | Shankar, 2018  |

|                                                                                     |                                                                                                                                                                                           |                  |                                       |                                        |                |
|-------------------------------------------------------------------------------------|-------------------------------------------------------------------------------------------------------------------------------------------------------------------------------------------|------------------|---------------------------------------|----------------------------------------|----------------|
| 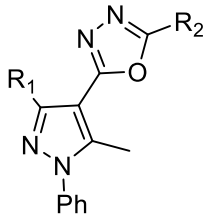   |  <p><math>R_1, R_2 =</math></p> <p>81</p>                                                                | MIC              | 25 $\mu\text{g mL}^{-1}$<br>(44.75)   | <i>Fusarium oxysporum</i><br>MTCC 284  | Ningaiah, 2013 |
|                                                                                     |  <p><math>R_1 =</math></p> <p><math>R_2 = \text{Ph}</math></p> <p>82</p>                                 |                  | 25 $\mu\text{g mL}^{-1}$<br>(57.01)   |                                        |                |
|    |  <p>68</p>                                                                                               | EC <sub>80</sub> | 20 $\mu\text{g mL}^{-1}$<br>(45.50)   | <i>Fusarium oxysporum</i><br>NCIM 1332 | Nikalje, 2017  |
|                                                                                     |  <p>69</p>                                                                                              |                  | 20 $\mu\text{g mL}^{-1}$<br>(47.00)   |                                        |                |
|  | <p><math>R_3 = \text{H}</math> <math>R_2 =</math> </p> <p><math>R_1 = \text{NO}_2</math></p> <p>19</p> | MIC              | 12.5 $\mu\text{g mL}^{-1}$<br>(45.58) | <i>Fusarium oxysporum</i>              | Sharma, 2017   |
|                                                                                     | <p><math>R_3 = \text{H}</math> <math>R_2 =</math> </p> <p><math>R_1 = \text{Cl}</math></p> <p>20</p>   |                  | 12.5 $\mu\text{g mL}^{-1}$<br>(47.40) |                                        |                |
|  |  <p>120</p>                                                                                            | MIC              | 16 $\mu\text{g mL}^{-1}$<br>(46.82)   | <i>Fusarium oxysporum</i><br>PTCC 5115 | Aryan, 2018    |
|  | <p><math>R_1 = i\text{-Pr}</math></p> <p><math>R_2 =</math> </p> <p>5</p>                              | IC <sub>50</sub> | 52 $\pm$ 5 $\mu\text{M}$              | <i>Fusarium oxysporum</i>              | Quiroga, 2019  |
|                                                                                     | <p><math>R_1 = \text{Et}</math></p> <p><math>R_2 =</math> </p> <p>6</p>                                |                  | 56 $\pm$ 3 $\mu\text{M}$              |                                        |                |

|                                                                                     |                                                                                                                                          |                  |                                           |                                      |                   |
|-------------------------------------------------------------------------------------|------------------------------------------------------------------------------------------------------------------------------------------|------------------|-------------------------------------------|--------------------------------------|-------------------|
| 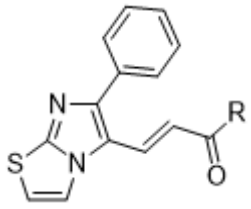   | <br><b>121</b>                                          | IC <sub>50</sub> | 0.02 mg mL <sup>-1</sup><br>(53.69)       | <i>Fusarium oxysporum</i>            | Koudad, 2019      |
|    | <br><b>9</b>                                            | MIC              | 25 µg mL <sup>-1</sup><br>(57.27)         | <i>Fusarium oxysporum</i>            | Pochampally, 2014 |
|   | <br><b>13</b>                                           | MIC              | 16 µg mL <sup>-1</sup><br>(58.24)         | <i>Fusarium oxysporum</i> ATCC 48112 | Castro, 2013      |
|                                                                                     | <br><b>14</b>                                          |                  | 32 µg mL <sup>-1</sup><br>(96.44)         |                                      |                   |
|  | <br><b>45</b>                                         | MIC              | 30 µg mL <sup>-1</sup><br>(59.93)         | <i>Fusarium oxysporum</i>            | Arumugam, 2012    |
|                                                                                     | <br><b>46</b>                                         |                  | 35 µg mL <sup>-1</sup><br>(64.15)         |                                      |                   |
|  | <br><b>47</b>                                         |                  | 30 µg mL <sup>-1</sup><br>(66.59)         |                                      |                   |
|                                                                                     | <br><b>48</b>                                         |                  | 35 µg mL <sup>-1</sup><br>(72.83)         |                                      |                   |
|                                                                                     | $R_1 = \text{---SO}_2\text{CH}_3$ $R_2 = \text{---}$  | MIC              | 25 ± 1.443 µg mL <sup>-1</sup><br>(61.14) | <i>Fusarium oxysporum</i>            | Sangshetti, 2011  |

|                                                                                     |                                                                                 |                  |                                               |                                         |                  |
|-------------------------------------------------------------------------------------|---------------------------------------------------------------------------------|------------------|-----------------------------------------------|-----------------------------------------|------------------|
| 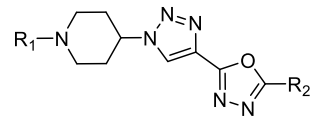   | $R_1 = -SO_2CH_3$ $R_2 = -C_6H_4-OH$<br><b>123</b>                              |                  | $25 \pm 2.500 \mu\text{g mL}^{-1}$<br>(64.03) |                                         |                  |
|    | $R = CHO$<br><b>1</b>                                                           | MIC              | $19.8 \pm 6.4 \mu\text{g mL}^{-1}$<br>(65.46) | <i>Fusarium oxysporum</i><br>ATCC 48112 | Gonzalez, 2010   |
|    | $R_1 = Cl$ $R_2 = Cl$ $R_3 = H$<br><b>71</b>                                    | MIC              | $25 \mu\text{g mL}^{-1}$<br>(66.45)           | <i>Fusarium oxysporum</i><br>NCIM 1332  | Shaikh, 2016     |
|                                                                                     | $R_1 = Cl$ $R_2 = H$ $R_3 = Cl$<br><b>72</b>                                    |                  | $25 \mu\text{g mL}^{-1}$<br>(66.45)           |                                         |                  |
|   | $R_1 = C_6H_5$ $R_2 = CH_3$<br><b>49</b>                                        | EC <sub>50</sub> | $18.0 \mu\text{g mL}^{-1}$<br>(67.10)         | <i>Fusarium oxysporum</i>               | Kokurkina, 2011  |
|                                                                                     | $R_1 = C_6H_5$ $R_2 = H$<br><b>50</b>                                           |                  | $21.5 \mu\text{g mL}^{-1}$<br>(84.56)         |                                         |                  |
|  | $R = Cl$<br><b>35</b>                                                           | MIC              | $25 \mu\text{g mL}^{-1}$<br>(70.67)           | <i>Fusarium oxysporum</i><br>NCIM 1332  | Khare, 2019      |
|                                                                                     | $R = OMe$<br><b>36</b>                                                          |                  | $25 \mu\text{g mL}^{-1}$<br>(71.56)           |                                         |                  |
|  | $R = Br$<br><b>124</b>                                                          | MIC              | $25 \mu\text{g mL}^{-1}$<br>(71.39)           | <i>Fusarium oxysporum</i>               | Thirupathi, 2014 |
|                                                                                     | $R = NO_2$<br><b>125</b>                                                        |                  | $25 \mu\text{g mL}^{-1}$<br>(79.04)           |                                         |                  |
|  | $R_1 = -C_6H_4-S-C(=S)-NH-C(=O)-C_6H_4-R_3$<br>$R_2 = CH_3$ $R_3 = H$ $R_4 = H$ | MIC              | $25 \mu\text{g mL}^{-1}$<br>(76.36)           | <i>Fusarium oxysporum</i>               | Subhedar, 2016   |

|                                                                                     |                                                                                                   |                   |                                       |                                        |                 |
|-------------------------------------------------------------------------------------|---------------------------------------------------------------------------------------------------|-------------------|---------------------------------------|----------------------------------------|-----------------|
|                                                                                     | <b>127</b>                                                                                        |                   |                                       |                                        |                 |
| 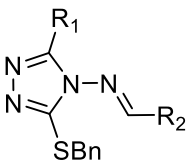   | $R_1 = \text{Bn}$<br>$R_2 = \text{---} \text{C}_6\text{H}_4 \text{---} \text{OMe}$<br><b>79</b>   | MIC               | 32 $\mu\text{g mL}^{-1}$<br>(77.19)   | <i>Fusarium oxysporum</i><br>NCIM 1008 | Bathia, 2011    |
|    | <br><b>73</b>    | MIC               | 30 $\mu\text{g mL}^{-1}$<br>(78.63)   | <i>Fusarium oxysporum</i><br>NCIM 1332 | Darandale, 2013 |
|                                                                                     | <br><b>74</b>    |                   | 40 $\mu\text{g mL}^{-1}$<br>(90.50)   |                                        |                 |
|   | <br><b>37</b>    | MIC               | 30 $\mu\text{g mL}^{-1}$<br>(78.86)   | <i>Fusarium oxysporum</i><br>NCIM 1332 | Chate, 2019     |
|                                                                                     | <br><b>38</b>  |                   | 28 $\mu\text{g mL}^{-1}$<br>(92.00)   |                                        |                 |
|  | <br><b>128</b> | EC <sub>50</sub>  | 6.25 $\mu\text{g mL}^{-1}$<br>(80.54) | <i>Fusarium oxysporum</i>              | Ahmed, 2019     |
|                                                                                     | <br><b>129</b> |                   | 6.25 $\mu\text{g mL}^{-1}$<br>(98.52) |                                        |                 |
|  | <br><b>130</b> | MIC <sub>80</sub> | 37 $\mu\text{g mL}^{-1}$<br>(84.97)   | <i>Fusarium oxysporum</i><br>NCIM 1332 | Tiwari, 2018    |
|                                                                                     | <br><b>131</b> |                   | 35 $\mu\text{g mL}^{-1}$<br>(86.11)   |                                        |                 |
|                                                                                     |                |                   | 40 $\mu\text{g mL}^{-1}$<br>(98.41)   |                                        |                 |

|                                                                                   | 132                                                                                             |                  |                                      |                                                  |                |
|-----------------------------------------------------------------------------------|-------------------------------------------------------------------------------------------------|------------------|--------------------------------------|--------------------------------------------------|----------------|
| 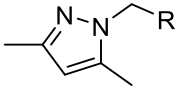 | <br><b>70</b>  | IC <sub>50</sub> | 0.086 mM<br>(86.00)                  | <i>Fusarium oxysporum</i> f.sp. <i>albedinis</i> | Abrigach, 2017 |
|  | <br><b>126</b> | MIC              | 50 µg mL <sup>-1</sup><br>(87.66)    | <i>Fusarium oxysporum</i>                        | Arumugam, 2010 |
|  | <br><b>80</b>  | EC <sub>50</sub> | 29.89 µg mL <sup>-1</sup><br>(98.60) | <i>Fusarium oxysporum</i>                        | Xu, 2011       |
